# Supplementary material for: Quantifying Plant-Borne Carbon Assimilation by Root-Associating Bacteria
Source: MDPI journal article supplement (doi:10.3390/microorganisms8050700), 2020-05-10
Supplement: s1 [file s1]

Supplementary File

Communication

# Quantifying plant-borne carbon assimilation by root-associating bacteria

Spenser Waller<sup>1</sup>, Stacy L. Wilder<sup>2</sup>, Michael J. Schueller<sup>2,3</sup>, Alexandra B. Housh<sup>2,3</sup> and Richard A. Ferrieri<sup>2,3,4,\*</sup>

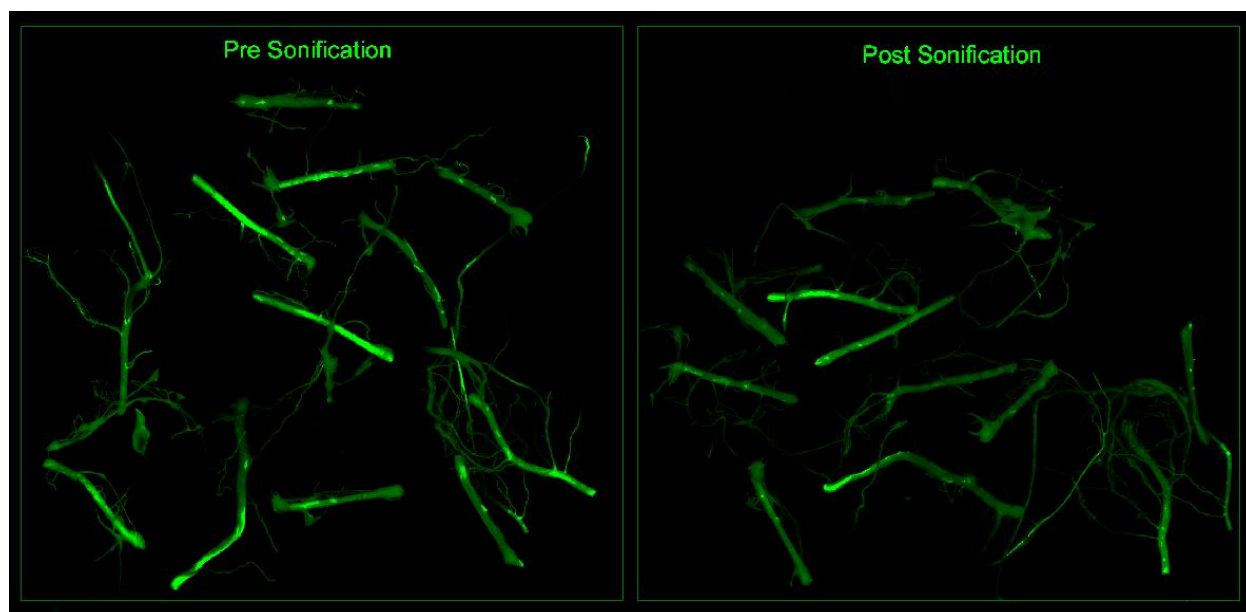

**Fig. S.1. Raw radioactivity count data and fluorescence data from Figure 6.** Root pieces were subjected to isolated green fluorescent protein (GFP) imaging to monitor the effect of sequential removal of bacteria during serial sonication in saline solution on root fluorescence.

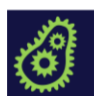

Table S.1. Raw radioactivity count data and fluorescence data from Figure 6.

| Study No. | Sample Counted | delta T (min) | Radioactivity (cpm) * | Decay Corrected Activity (cpm) * | Efficiency Corrected (dpm) ** | Fraction Total Plant C-11 Activity | Number of C-11 Atoms | nmoles of Carbon | Cuvette Fluorescence | CFU  |
|-----------|----------------|---------------|-----------------------|----------------------------------|-------------------------------|------------------------------------|----------------------|------------------|----------------------|------|
| 1         | Cuvette        | 146           | 39729                 | 5663414                          | 5663414                       | 0.0769                             | 6.79E+15             | 11.27            | 858647               | 3.15 |
|           | Shoots         | 257           | 34292                 | 212213354                        | 3021918163                    | 41.0586                            |                      |                  |                      |      |
|           | Load Leaf      | 274           | 16237                 | 179014385                        | 2549164849                    | 34.6354                            |                      |                  |                      |      |
|           | Root Wash      | 187           | 559                   | 320824                           | 4568541                       | 0.0621                             |                      |                  |                      |      |
|           | Turf Medium    | 202           | 105                   | 100692                           | 1433854                       | 0.0195                             |                      |                  |                      |      |
|           | Roots          | 241           | 33792                 | 121435174                        | 1729236879                    | 23.4950                            |                      |                  |                      |      |
|           |                |               |                       | <b>Total Plant Activity</b>      | <b>7360006550</b>             | <b>100</b>                         |                      |                  |                      |      |
| 2         | Cuvette        | 104           | 29914                 | 1023791                          | 1023791                       | 0.04                               | 2.36E+14             | 0.39             | 250105               | 0.92 |
|           | Shoots         | 291           | 15517                 | 304789720                        | 3340205606                    | 19.85                              |                      |                  |                      |      |
|           | Load Leaf      | 304           | 134950                | 1929926567                       | 4601862151                    | 68.01                              |                      |                  |                      |      |
|           | Root Wash      | 104           | 14703                 | 503203                           | 7165604                       | 0.03                               |                      |                  |                      |      |
|           | Turf Medium    | 100           | 13067                 | 390391                           | 5559168                       | 0.03                               |                      |                  |                      |      |
|           | Roots          | 293           | 8797                  | 184941180                        | 2633562402                    | 12.04                              |                      |                  |                      |      |
|           |                |               |                       | <b>Total Plant Activity</b>      | <b>21870364184</b>            | <b>100</b>                         |                      |                  |                      |      |
| 3         | Cuvette        | 158           | 921                   | 197366                           | 197366                        | 0.0831                             | 1.23E+15             | 2.04             | 465015               | 1.71 |
|           | Shoots         | 208           | 37717                 | 44178188                         | 629097392                     | 27.9328                            |                      |                  |                      |      |
|           | Load Leaf      | 304           | 24856                 | 85377454                         | 1215774942                    | 53.9821                            |                      |                  |                      |      |
|           | Root Wash      | 87            | 1335                  | 25646                            | 365194                        | 0.0162                             |                      |                  |                      |      |
|           | Turf Medium    | 113           | 24                    | 1115                             | 15880                         | 0.0007                             |                      |                  |                      |      |
|           | Roots          | 180           | 62867                 | 28444988                         | 405056633                     | 17.9851                            |                      |                  |                      |      |
|           |                |               |                       | <b>Total Plant Activity</b>      | <b>2252180895</b>             | <b>100</b>                         |                      |                  |                      |      |
| 4         | Cuvette        | 124           | 10949                 | 739224                           | 739224                        | 0.0781                             | 8.86E+14             | 1.47             | 618505               | 2.27 |
|           | Shoots         | 260           | 57533                 | 394238619                        | 5613957937                    | 62.5394                            |                      |                  |                      |      |
|           | Load Leaf      | 262           | 26085                 | 191501842                        | 2726845101                    | 30.3770                            |                      |                  |                      |      |
|           | Root Wash      | 94            | 10290                 | 250738                           | 3570507                       | 0.0398                             |                      |                  |                      |      |
|           | Turf Medium    | 111           | 4274                  | 185543                           | 2642129                       | 0.0294                             |                      |                  |                      |      |
|           | Roots          | 249           | 9272                  | 43725012                         | 622644172                     | 6.9363                             |                      |                  |                      |      |
|           |                |               |                       | <b>Total Plant Activity</b>      | <b>8976667050</b>             | <b>100</b>                         |                      |                  |                      |      |

\* cpm defined as radioactivity counts per minute.

\*\* dpm defined as radioactivity disintegrations per minute.

Raw data is shown in Table S.1 reflecting the nature of applied calculations. Carbon-11 activity was counted on a gamma counter giving counts per minute (cpm). Samples included the cuvette which contained the sonication solution, the load leaf which was initially exposed to  $^{11}\text{CO}_2$ , the distal plant tissues where all  $^{11}\text{C}$ -photosynthate translocated to and the root wash solution and Turface™ growth medium accounting for  $^{11}\text{C}$ -exudates. Altogether, all components counted comprised the total amount of  $^{11}\text{C}$ -activity fixed by the plant at the beginning of the study. The delta T values reflect the elapsed time in minutes from the end-of-bombardment (EOB) when the radioactivity was first produced on the cyclotron to the time when the sample was counted. Raw radioactivity counts were decay corrected back to EOB using the following equation:

$$A_0 = A_T \cdot \exp(\lambda T)$$

where  $A_0$  is the calculated decay corrected radioactivity at  $T_0$  or EOB,  $A_T$  is the measured radioactivity at time T,  $\lambda$  is the decay constant equal to  $(\ln 2/t_{1/2})$  where  $t_{1/2}$  is the half-life for  $^{11}\text{C}$  equal to 20.4 min., and T is the elapse time from EOB to when the sample was counted.

After decay correction, data was corrected for intrinsic detector efficiency and geometry efficiency enabling us to convert counts per minute (cpm) to disintegrations per minute (dpm). All the samples were summed providing a total plant  $^{11}\text{C}$ -activity value that was used to calculate

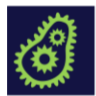

microbial  $^{11}\text{C}$ -assimilation as the fraction of total  $^{11}\text{C}$ -activity. Disintegrations per minute (dpm) can be related to theoretical number of  $^{11}\text{C}$  atoms by the relationship:

$$2.22 \times 10^{12} \text{ dpm} = 1 \text{ Curie (Ci) of radioactivity (or } 3.7 \times 10^{10} \text{ Becquerel (Bq) in SI units)}$$

1 Curie of radioactivity is defined as the amount of radioactivity given off by 1 gm amount of  $^{226}\text{Ra}$ . Using this relationship the number of  $^{11}\text{C}$  atoms can be calculated and converted to molar mass units using Avogadro's number ( $6.023 \times 10^{23}$  atoms/mole). Cuvette fluorescence values were converted to CFUs using the relationship from Fig. 5:

$$y = 833.3 x^2 + 182037 x$$

where y represents the experimentally measured cuvette fluorescence corrected for background fluorescence obtained from a deionized water sample and x is the calculated colony forming units (CFU) of bacteria.
